# Supplementary material for: Modeling and Simulation of Optimal Resource Management during the Diurnal Cycle in Emiliania huxleyi by Genome-Scale Reconstruction and an Extended Flux Balance Analysis Approach
Source: MDPI journal article supplement (doi:10.3390/metabo5040659), 2015-10-28
Supplement: s1 [file s1]

| Reaction ID                                    | Full reaction name                                                                                           | Equation                                                                                                                                                                                                                                                                                                                  | diuFBA result (day) | diuFBA result (night) |
|------------------------------------------------|--------------------------------------------------------------------------------------------------------------|---------------------------------------------------------------------------------------------------------------------------------------------------------------------------------------------------------------------------------------------------------------------------------------------------------------------------|---------------------|-----------------------|
| +T_H2O_c_er                                    | H2O transport (cytoplasm to ER)                                                                              | $\text{h2o}[\text{c}] \rightleftharpoons \text{h2o}[\text{r}]$                                                                                                                                                                                                                                                            | 0,079               | 0,000                 |
| 4R5AU.SYNT2                                    | 5-Amino-6-(1-D-ribitylamino)uracil Synthetase                                                                | $5 \text{ h2o}[\text{c}] + \text{nadph}[\text{c}] + \text{gtp}[\text{c}] \rightarrow \text{nadp}[\text{c}] + \text{for}[\text{c}] + \text{ppi}[\text{c}] + \text{nh3\_}[\text{c}] + 4\text{r5au}[\text{c}] + \text{pi}[\text{c}] + \text{h}[\text{c}]$                                                                    | 0,001               | 0,000                 |
| AAT                                            | aspartate aminotransferase                                                                                   | $\text{asp-L}[\text{c}] + \text{akg}[\text{c}] \rightleftharpoons \text{oaa}[\text{c}] + \text{glu-L}[\text{c}]$                                                                                                                                                                                                          | -0,906              | 0,000                 |
| AB.AKG.AMINOTRANS                              | 4-aminobutanoate:2-oxoglutarate aminotransferase                                                             | $\text{akg}[\text{c}] + 4\text{abut}[\text{c}] \rightleftharpoons \text{glu-L}[\text{c}] + \text{sucsa}[\text{c}]$                                                                                                                                                                                                        | 0,000               | 0,000                 |
| ACALTRANSF                                     | acetaldehydetransferase (decarboxylating)                                                                    | $\text{h}[\text{c}] + \text{pyr}[\text{c}] + 2\text{obut}[\text{c}] \rightleftharpoons \text{co2}[\text{c}] + 2\text{ahbut}[\text{c}]$                                                                                                                                                                                    | 0,040               | 0,000                 |
| ACO                                            | Aconitase                                                                                                    | $\text{cit}[\text{m}] \rightleftharpoons \text{icit}[\text{m}]$                                                                                                                                                                                                                                                           | 0,446               | 0,704                 |
| ACS-H                                          | acetyl-CoA synthetase (chloroplastide)                                                                       | $\text{ac}[\text{h}] + \text{atp}[\text{h}] + \text{coa}[\text{h}] \rightleftharpoons \text{amp}[\text{h}] + \text{ppi}[\text{h}] + \text{accoa}[\text{h}]$                                                                                                                                                               | 3,891               | 0,000                 |
| ACS-M                                          | mitochondrial Acetyl-CoA Synthetase (Ligase)                                                                 | $\text{coa}[\text{m}] + \text{ac}[\text{m}] + \text{atp}[\text{m}] \rightleftharpoons \text{amp}[\text{m}] + \text{ppi}[\text{m}] + \text{accoa}[\text{m}]$                                                                                                                                                               | -3,885              | 0,000                 |
| ADCHO.LYASE                                    | aminodeoxychorismate lyase                                                                                   | $4\text{adcho}[\text{c}] \rightarrow \text{h}[\text{c}] + \text{pyr}[\text{c}] + 4\text{abz}[\text{c}]$                                                                                                                                                                                                                   | 0,001               | 0,000                 |
| ADCHO.SYNT                                     | aminodeoxychorismate synthase                                                                                | $\text{chor}[\text{c}] + \text{gln-L}[\text{c}] \rightarrow \text{glu-L}[\text{c}] + 4\text{adcho}[\text{c}]$                                                                                                                                                                                                             | 0,001               | 0,000                 |
| ADN.AMINOHYD                                   | adenosine aminohydrolase                                                                                     | $\text{nh3\_}[\text{c}] + \text{ins}[\text{c}] \rightleftharpoons \text{h2o}[\text{c}] + \text{adn}[\text{c}]$                                                                                                                                                                                                            | 0,188               | 0,000                 |
| ADN.KIN                                        | adenosine kinase                                                                                             | $\text{adn}[\text{c}] + \text{atp}[\text{c}] \rightarrow \text{h}[\text{c}] + \text{adp}[\text{c}] + \text{amp}[\text{c}]$                                                                                                                                                                                                | 0,188               | 0,000                 |
| AICAR.SYNT                                     | adenylosuccinate lyase (aicar Synthase)                                                                      | $25\text{aics}[\text{c}] \rightleftharpoons \text{fum}[\text{c}] + \text{aicar}[\text{c}]$                                                                                                                                                                                                                                | 0,225               | 0,000                 |
| AL.GLX.TRANSAM                                 | alanine glyoxylate transaminase                                                                              | $\text{glx}[\text{c}] + \text{ala-L}[\text{c}] \rightarrow \text{pyr}[\text{c}] + \text{gly}[\text{c}]$                                                                                                                                                                                                                   | 0,000               | 0,000                 |
| ALAC.SYNT3                                     | acetolactate synthase                                                                                        | $\text{h}[\text{c}] + 2 \text{pyr}[\text{c}] \rightarrow \text{co2}[\text{c}] + \text{alac-S}[\text{c}]$                                                                                                                                                                                                                  | 0,175               | 0,000                 |
| ALACREDISO                                     | acetolactate reductoisomerase                                                                                | $\text{alac-S}[\text{c}] \rightleftharpoons \text{oxbutat}[\text{c}]$                                                                                                                                                                                                                                                     | 0,175               | 0,000                 |
| ALDH                                           | aldehyde dehydrogenase (NADP+ / NAD+)                                                                        | $\text{h2o}[\text{c}] + \text{nad}[\text{c}] + \text{acald}[\text{c}] \rightleftharpoons 2 \text{ h}[\text{c}] + \text{nadh}[\text{c}] + \text{ac}[\text{c}]$                                                                                                                                                             | -0,675              | 0,000                 |
| ALDH-NADP                                      | aldehyde dehydrogenase (NADP+ )                                                                              | $\text{h2o}[\text{c}] + \text{nadp}[\text{c}] + \text{acald}[\text{c}] \rightleftharpoons \text{nadph}[\text{c}] + 2 \text{ h}[\text{c}] + \text{ac}[\text{c}]$                                                                                                                                                           | 0,675               | 0,000                 |
| ALK.PHOS                                       | alkaline phosphatase                                                                                         | $3 \text{ h2o}[\text{c}] + \text{ahdt}[\text{c}] \rightarrow 3 \text{ pi}[\text{c}] + 2 \text{ h}[\text{c}] + \text{dhnpt}[\text{c}]$                                                                                                                                                                                     | 0,001               | 0,000                 |
| ALT                                            | alanine transaminase                                                                                         | $\text{glu-L}[\text{c}] + \text{pyr}[\text{c}] \rightleftharpoons \text{akg}[\text{c}] + \text{ala-L}[\text{c}]$                                                                                                                                                                                                          | 0,339               | 0,000                 |
| AMP.DEAM.ir                                    | AMP deaminase                                                                                                | $\text{h2o}[\text{c}] + \text{amp}[\text{c}] \rightarrow \text{nh3\_}[\text{c}] + \text{imp}[\text{c}]$                                                                                                                                                                                                                   | 0,000               | 0,000                 |
| AMP.KIN                                        | adenylate kinase                                                                                             | $\text{atp}[\text{c}] + \text{amp}[\text{c}] \rightleftharpoons 2 \text{ adp}[\text{c}]$                                                                                                                                                                                                                                  | 1,213               | 0,000                 |
| ARAB.ISO                                       | L-arabinose isomerase                                                                                        | $\text{rbl-L}[\text{c}] \rightleftharpoons \text{arab-L}[\text{c}]$                                                                                                                                                                                                                                                       | 0,745               | 0,000                 |
| ARGINASE.irrev                                 | arginase                                                                                                     | $\text{h2o}[\text{c}] + \text{arg-L}[\text{c}] \rightarrow \text{orni}[\text{c}] + \text{urea}[\text{c}]$                                                                                                                                                                                                                 | 0,000               | 0,000                 |
| ARGSUCLY                                       | argininosuccinate lyase                                                                                      | $\text{argsuc}[\text{c}] \rightleftharpoons \text{fum}[\text{c}] + \text{arg-L}[\text{c}]$                                                                                                                                                                                                                                | 0,186               | 0,000                 |
| ARGSUCSYNT                                     | argininosuccinate synthase                                                                                   | $\text{asp-L}[\text{c}] + \text{atp}[\text{c}] + \text{citr-L}[\text{c}] \rightleftharpoons \text{ppi}[\text{c}] + \text{h}[\text{c}] + \text{amp}[\text{c}] + \text{argsuc}[\text{c}]$                                                                                                                                   | 0,186               | 0,000                 |
| AS                                             | asparagine synthetase (glutamine-hydrolysing)                                                                | $\text{nh3\_}[\text{c}] + \text{asp-L}[\text{c}] + \text{atp}[\text{c}] \rightleftharpoons \text{ppi}[\text{c}] + \text{amp}[\text{c}] + \text{asn-L}[\text{c}]$                                                                                                                                                          | 0,084               | 0,000                 |
| ASP.CBP.TRANS                                  | aspartate carbamoyltransferase                                                                               | $\text{asp-L}[\text{c}] + \text{cbp}[\text{c}] \rightarrow \text{pi}[\text{c}] + \text{h}[\text{c}] + \text{cbasp}[\text{c}]$                                                                                                                                                                                             | 0,057               | 0,000                 |
| ASP.KIN                                        | aspartate kinase                                                                                             | $\text{asp-L}[\text{c}] + \text{atp}[\text{c}] \rightarrow \text{adp}[\text{c}] + 4\text{pasp}[\text{c}]$                                                                                                                                                                                                                 | 0,270               | 0,000                 |
| ASPSA.DH                                       | aspartate-semialdehyde dehydrogenase                                                                         | $\text{nadph}[\text{c}] + \text{h}[\text{c}] + 4\text{pasp}[\text{c}] \rightleftharpoons \text{nadp}[\text{c}] + \text{pi}[\text{c}] + \text{aspsa}[\text{c}]$                                                                                                                                                            | 0,270               | 0,000                 |
| BETA-0X3-M                                     | beta oxidation of fatty acid -coa.replacement (Mitochondria)                                                 | $8.123 \text{ coa}[\text{m}] + 8.123 \text{ nad}[\text{m}] + \text{fa-coa.replace\_}[\text{m}] + 8.123 \text{ h2o}[\text{m}] + 5.28 \text{ fad}[\text{m}] \rightarrow 9.123 \text{ accoa}[\text{m}] + 8.123 \text{ nadh}[\text{m}] + 8.123 \text{ h}[\text{m}] + 5.28 \text{ fadh2}[\text{m}]$                            | 0,000               | 0,000                 |
| BETA.GAL(300)                                  | beta-galactosidase; Galactan galactohydrolase                                                                | $299 \text{ h2o}[\text{c}] + \text{udp.galactan}(300)[\text{c}] \rightarrow 299 \text{ gal}[\text{c}] + \text{udpgal}[\text{c}]$                                                                                                                                                                                          | 0,000               | 0,000                 |
| BIOM_LOG_200µE_16h_light_neutralcharge_e_final | biomass reaction for E.huxleyi in exp growth phase with high Irradiation during light phase (200µE /m^2*s)   | $1.006 \text{ h}[\text{c}] + \text{main.biomass1}[\text{c}] + 0.44222 \text{ protein.biomass1.6}[\text{c}] + 0.58827 \text{ lipid.biomass5.}[\text{c}] + 0.71108 \text{ lcm.biomass2.1}[\text{c}] + 1.372 \text{ lmwm.biomass}[\text{c}] \rightarrow \text{biomass\_log\_200\_16h\_light\_neutrcharge\_final2}[\text{c}]$ | 0,000               | 0,000                 |
| BIOM_LOG_200µE_24h_neutralcharge_final         | biomass reaction for E.huxleyi in exp growth phase with high Irradiation during light phase (200µE /m^2*s)   | $0.98997 \text{ h}[\text{c}] + \text{main.biomass1}[\text{c}] + 1.3386 \text{ protein.biomass1.6}[\text{c}] + 0.55126 \text{ lipid.biomass5.}[\text{c}] + 0.36632 \text{ lcm.biomass2.1}[\text{c}] + 1.5383 \text{ lmwm.biomass}[\text{c}] \rightarrow \text{biomass\_log\_200\_24h\_neutrcharge\_final}[\text{c}]$       | 0,924               | 0,000                 |
| BIOM_LOG_50µE_16h_light_neutralcharge_final    | biomass reaction for E.huxleyi in exp growth phase with low Irradiation during 16h light phase (50µE /m^2*s) | $0.98223 \text{ h}[\text{c}] + \text{main.biomass1}[\text{c}] + 0.79948 \text{ protein.biomass1.6}[\text{c}] + 0.63279 \text{ lipid.biomass5.}[\text{c}] + 0.49194 \text{ lcm.biomass2.1}[\text{c}] + 1.4736 \text{ lmwm.biomass}[\text{c}] \rightarrow \text{biomass\_log\_50\_16h\_neutrcharge\_final}[\text{c}]$       | 0,000               | 0,000                 |
| BIOM_LOG_50µE_24h_neutralcharge_final          | biomass reaction for E.huxleyi in exp growth phase with high Irradiation during light phase (200µE /m^2*s)   | $0.72836 \text{ h}[\text{c}] + \text{main.biomass1}[\text{c}] + 1.8695 \text{ protein.biomass1.6}[\text{c}] + 0.67052 \text{ lipid.biomass5.}[\text{c}] + 0.30087 \text{ lcm.biomass2.1}[\text{c}] + 1.2306 \text{ lmwm.biomass}[\text{c}] \rightarrow \text{biomass\_log\_50\_24h\_neutrcharge\_final}[\text{c}]$        | 0,000               | 0,000                 |

|                  |                                                          |                                                                                                                     |        |        |
|------------------|----------------------------------------------------------|---------------------------------------------------------------------------------------------------------------------|--------|--------|
| C14:0_FS.SYNT2-H | C14:0 fatty acid synthesis (chloroplastide)              | 6 atp[h] + 7 accoa[h] + 12 nadph[h] + h2o[h] + 5 h[h] -> 7 coa[h] + 12 nadp[h] + 6 adp[h] + 6 pi[h] + 14:0_FS[h]    | 0,067  | 0,000  |
| C16:0_FS.SYNT-H  | C16:0 fatty acid synthesis (chloroplastide)              | 7 atp[h] + 8 accoa[h] + 14 nadph[h] + h2o[h] + 6 h[h] -> 8 coa[h] + 14 nadp[h] + 7 adp[h] + 7 pi[h] + hdca[h]       | 0,034  | 0,000  |
| C18:0_FS.SYNT-H  | C18:0 fatty acid synthesis (chloroplastide)              | 8 atp[h] + 9 accoa[h] + 16 nadph[h] + h2o[h] + 7 h[h] -> 9 coa[h] + 16 nadp[h] + 8 adp[h] + 8 pi[h] + ocdca[h]      | 0,215  | 0,000  |
| C18:1.DESAT-H    | (18:1) desaturase (chloroplastide)                       | h[h] + ocdca[h] + o2[h] + nadh[h] <=> 2 h2o[h] + nad[h] + ocdcea[h]                                                 | 0,212  | 0,000  |
| C18:2.DESAT-H    | (18:2) desaturase (chloroplastide)                       | h[h] + o2[h] + nadh[h] + ocdcea[h] <=> 2 h2o[h] + nad[h] + ocdciea[h]                                               | 0,122  | 0,000  |
| C18:3.DESAT2-H   | (18:3) desaturase (chloroplastide)                       | h[h] + o2[h] + nadh[h] + ocdciea[h] <=> 2 h2o[h] + nad[h] + ocdctria[h]                                             | 0,099  | 0,000  |
| C18:4.DESAT-H    | (18:4) desaturase (chloroplastide)                       | h[h] + o2[h] + nadh[h] + ocdctria[h] <=> 2 h2o[h] + nad[h] + ocdctetra[h]                                           | 0,074  | 0,000  |
| C18:5.DESAT-H    | (18:5) desaturase (chloroplastide)                       | h[h] + o2[h] + nadh[h] + ocdctetra[h] <=> 2 h2o[h] + nad[h] + ocdcpenta[h]                                          | 0,042  | 0,000  |
| C22:0_FS.SYNT-H  | (22:0) fatty acid synthesis (chloroplastide)             | 10 atp[h] + 11 accoa[h] + 20 nadph[h] + h2o[h] + 9 h[h] -> 11 coa[h] + 20 nadp[h] + 10 adp[h] + 10 pi[h] + c22:0[h] | 0,110  | 0,000  |
| C22:6.DESAT-H    | (22:6) desaturase (chloroplastide)                       | 6 h[h] + 6 o2[h] + 6 nadh[h] + c22:0[h] <=> 12 h2o[h] + 6 nad[h] + c22:6[h]                                         | 0,110  | 0,000  |
| CALCI-2-O        | calcification                                            | hco3[o] + ca2[o] <=> h[o] + caco3[o]                                                                                | 23,520 | 11,760 |
| CBPSYNT          | carbamoylphosphat synthetase                             | h2o[c] + nh3_[c] + co2[c] + 2 atp[c] <=> pi[c] + 2 h[c] + 2 adp[c] + cbp[c]                                         | 0,243  | 0,000  |
| CHOR.SYNT4       | chorismate synthesis                                     | nadph[c] + atp[c] + e4p[c] + 2 pep[c] <=> nadp[c] + 4 pi[c] + chor[c] + adp[c]                                      | 0,047  | 0,000  |
| CHORM            | chorismate mutase                                        | chor[c] -> pphn[c]                                                                                                  | 0,043  | 0,000  |
| CO2c-m           | CO2 transport via diffusion (cytoplasm to mitochondrium) | co2[c] <=> co2[m]                                                                                                   | -4,790 | -2,113 |
| CO2c-p           | CO2 transport via diffusion (cytoplasm to chloroplast)   | co2[c] <=> co2[h]                                                                                                   | 41,011 | 0,000  |
| CO2trex          | CO2 transport via diffusion (extracellular to cytoplasm) | co2[e] <=> co2[c]                                                                                                   | 61,087 | 9,647  |
| CS-M             | citrate synthase                                         | accoa[m] + h2o[m] + oaa[m] -> cit[m] + coa[m] + h[m]                                                                | 0,446  | 0,704  |
| CTPS1            | CTP synthase                                             | nh3_[c] + atp[c] + utp[c] -> pi[c] + h[c] + adp[c] + ctp[c]                                                         | 0,035  | 0,000  |
| CTPS3            | CTP synthase (glutamine)                                 | h2o[c] + gln-L[c] + atp[c] + utp[c] -> pi[c] + 2 h[c] + glu-L[c] + adp[c] + ctp[c]                                  | 0,000  | 0,000  |
| CYSDS            | cysteine Desulfhydrase                                   | h2o[c] + cys-L[c] -> pyr[c] + h2s[c] + nh4[c]                                                                       | 0,000  | 0,000  |
| CYSSYNT-M        | cysteine synthetase (mitochondrion)                      | acser[m] + h2s[m] <=> ac[m] + h[m] + cys-L[m]                                                                       | 0,006  | 0,000  |
| CYSTASYNT        | cystathionine beta-synthase                              | ser-L[c] + hcys-L[c] <=> h2o[c] + cyst-L[c]                                                                         | -0,003 | 0,000  |
| CYSTHIO          | cystathionase                                            | h2o[c] + cyst-L[c] <=> 2obut[c] + cys-L[c] + nh4[c]                                                                 | -0,003 | 0,000  |
| CYTK1            | cytidylate kinase (CMP)                                  | atp[c] + cmp[c] <=> adp[c] + cdp[c]                                                                                 | 0,085  | 0,000  |
| CYTK2            | cytidylate kinase (dCMP)                                 | atp[c] + dcmp[c] <=> adp[c] + dcdp[c]                                                                               | 0,001  | 0,000  |
| DAPDC            | diaminopimelate decarboxylase                            | h[c] + 26dap-M[c] -> co2[c] + lys-L[c]                                                                              | 0,022  | 0,000  |
| DAPE             | diaminopimelate epimerase                                | 26dap-LL[c] <=> 26dap-M[c]                                                                                          | 0,022  | 0,000  |
| DB4PS            | 3,4-Dihydroxy-2-butanone-4-phosphate synthase            | ru5p-D[c] -> for[c] + h[c] + db4p[c]                                                                                | 0,001  | 0,000  |
| DCTP.DEAM        | dCMP Deaminase                                           | h2o[c] + dcmp[c] <=> nh3_[c] + dump[c]                                                                              | -0,001 | 0,000  |
| DHAD             | dihydroxy-acid dehydratase                               | 23dhmb[c] <=> h2o[c] + 3mob[c]                                                                                      | 0,175  | 0,000  |
| DHAHL            | dihydroxy-acid hydrolyase                                | 23dhmp[c] <=> h2o[c] + 3mop[c]                                                                                      | 0,040  | 0,000  |
| DHFR             | dihydrofolate reductase                                  | nadph[c] + h[c] + dhf[c] <=> nadp[c] + thf[c]                                                                       | 0,002  | 0,000  |
| DHFS             | dihydrofolate synthase                                   | glu-L[c] + atp[c] + dhpt[c] -> pi[c] + h[c] + adp[c] + dhf[c]                                                       | 0,001  | 0,000  |
| DHOOAT.DH        | dihydroorotate dehydrogenase                             | nad[c] + dhor-S[c] <=> h[c] + nadh[c] + orot[c]                                                                     | 0,057  | 0,000  |
| DHORTS           | dihydroorotase                                           | h2o[c] + dhor-S[c] <=> h[c] + cbasp[c]                                                                              | -0,057 | 0,000  |
| DHPS             | dihydropterolate synthase                                | 4abz[c] + dhpterin.pp[c] -> ppi[c] + dhpt[c]                                                                        | 0,001  | 0,000  |
| DIAM.PIMEL.SYNT  | LL-2,6-Diaminopimelate synthase                          | h[c] + glu-L[c] + pyr[c] + nadh[c] + aspsa[c] <=> h2o[c] + akg[c] + nad[c] + 26dap-LL[c]                            | 0,022  | 0,000  |
| DIHY.ALDO        | dihydroneopterin aldolase                                | dhnpt[c] -> gcald[c] + dhpterin[c]                                                                                  | 0,001  | 0,000  |
| DMLZ.SYNT        | "                                                        | 4r5au[c] + db4p[c] -> 2 h2o[c] + pi[c] + dmlz[c]                                                                    | 0,001  | 0,000  |

|                    |                                                             |                                                                                                                                                                                         |          |         |
|--------------------|-------------------------------------------------------------|-----------------------------------------------------------------------------------------------------------------------------------------------------------------------------------------|----------|---------|
| DTMPK              | dTMP kinase                                                 | atp[c] + dtmp[c] <=> adp[c] + dtdp[c]                                                                                                                                                   | 0,001    | 0,000   |
| DUTDPD             | dUTP diphosphatase                                          | h2o[c] + dutp[c] -> ppi[c] + h[c] + dump[c]                                                                                                                                             | 0,000    | 0,000   |
| ENO                | enolase                                                     | 2pg[c] <=> h2o[c] + pep[c]                                                                                                                                                              | 4,098    | -0,352  |
| ENO1-H             | enolase (chloroplastide)                                    | 2pg[h] <=> h2o[h] + pep[h]                                                                                                                                                              | 2,288    | 1,056   |
| ETHA.OXI           | ethanolamine oxidase                                        | h2o[c] + o2[c] + etha[c] -> nh3_[c] + h[c] + gcald[c] + h2o2[c]                                                                                                                         | 0,000    | 0,000   |
| EXP_COCC           | Coccolith Export                                            | caco3[o] ->                                                                                                                                                                             | 23,520   | 11,760  |
| EX_LCM.2.1         | Allocation of biomass precursor lcm.biomass2.1              | lcm.biomass2.1[e] <=>                                                                                                                                                                   | 0,000    | 0,000   |
| EX_LIPID5          | Allocation of biomass precursor lipid.biomass4              | lipid.biomass5.[e] <=>                                                                                                                                                                  | 0,000    | 0,000   |
| EX_LMWM            | Allocation of biomass precursor lmwm.biomass                | lmwm.biomass[e] <=>                                                                                                                                                                     | 0,000    | 0,000   |
| EX_ca2(e)          | Calcium exchange                                            | ca2[e] <=>                                                                                                                                                                              | -23,520  | -11,760 |
| EX_co2(e)          | CO2 exchange                                                | co2[e] <=>                                                                                                                                                                              | -61,087  | -9,647  |
| EX_h(e)            | H+ exchange                                                 | h[e] <=>                                                                                                                                                                                | 49,160   | 23,520  |
| EX_h2o(e)          | H2O exchange                                                | h2o[e] <=>                                                                                                                                                                              | -50,695  | -9,295  |
| EX_hn(e)           | Photon exchange                                             | hn[e] <=>                                                                                                                                                                               | -387,840 | 0,000   |
| EX_na1(e)          | Sodium exchange                                             | na1[e] <=>                                                                                                                                                                              | 0,000    | 0,000   |
| EX_nh4(e)          | Ammonia exchange                                            | nh4[e] <=>                                                                                                                                                                              | -3,615   | 0,000   |
| EX_no3(e)          | Nitrate exchange                                            | no3[e] <=>                                                                                                                                                                              | 0,000    | 0,000   |
| EX_o2(e)           | O2 exchange                                                 | o2[e] <=>                                                                                                                                                                               | 40,019   | -2,289  |
| EX_pi(e)           | Phosphate exchange                                          | pi[e] <=>                                                                                                                                                                               | -0,669   | 0,000   |
| EX_so4(e)          | Sulfate exchange                                            | so4[e] <=>                                                                                                                                                                              | -0,023   | 0,000   |
| Ex_HCO3(e)         | HCO3 exchange                                               | hco3[e] <=>                                                                                                                                                                             | 0,000    | 0,000   |
| F6PP               | D-fructose 6-phosphate phosphatase                          | h2o[c] + f6p[c] -> pi[c] + fru[c]                                                                                                                                                       | 0,000    | 0,000   |
| FA.REPL.COA.SYNT_d | Fatty Acid Replacement-CoA Synthetase                       | atp[h] + coa[h] + fa.replace_d[h] -> amp[h] + ppi[h] + fa-coa.replace_i[h]                                                                                                              | 0,425    | 0,000   |
| FA.REPL_16_3_f     | Fatty Acid Replacement, CO2 concentration [16,3 mmol/1000L] | 0.158 14:0_FS[h] + 0.079 hdca[h] + 0.006 ocdca[h] + 0.211 ocdcea[h] + 0.056 ocdcia[h] + 0.057 ocdctria[h] + 0.075 ocdctetra[h] + 0.099 ocdcpenta[h] + 0.259 c22:6[h] -> fa.replace_d[h] | 0,426    | 0,000   |
| FBA                | fructose-bisphosphate aldolase                              | fdp[c] <=> dhap[c] + g3p[c]                                                                                                                                                             | -3,320   | 0,352   |
| FBA-H              | fructose-bisphosphate aldolase (Chloroplast)                | fdp[h] <=> g3p[h] + dhap[h]                                                                                                                                                             | 0,000    | 0,000   |
| FBA2               | fructose-bisphosphate aldolase                              | s17bp[c] <=> e4p[c] + dhap[c]                                                                                                                                                           | 0,000    | 0,000   |
| FBA2-H             | fructose-bisphosphate aldolase (Chlorplast)                 | s17bp[h] <=> dhap[h] + e4p[h]                                                                                                                                                           | -27,402  | 0,000   |
| FBP                | fructose-bisphosphatase                                     | h2o[c] + fdp[c] -> pi[c] + f6p[c]                                                                                                                                                       | 3,320    | 0,000   |
| FBP-H              | fructose-bisphosphatase                                     | h2o[h] + fdp[h] -> pi[h] + f6p[h]                                                                                                                                                       | 0,000    | 0,000   |
| FER.OXRED-H        | Ferredoxin:NADP+ oxidoreductase (Chloroplastides)           | h[h] + nadp[h] + 2 redfer1[h] <=> nadph[h] + 2 oxfer[h]                                                                                                                                 | -8,993   | -1,056  |
| FER.OXRED-M        | Ferredoxin:NADP+ oxidoreductase (Mitochondrion)             | h[m] + 2 redfer1[m] + nadp[m] <=> nadph[m] + 2 oxfer[m]                                                                                                                                 | 8,975    | 1,056   |
| FMN.HYD            | FMN Phosphatase; riboflavin-5-phosphate phosphohydrolase    | h2o[c] + fmnc[c] -> pi[c] + ribflv[c]                                                                                                                                                   | 0,000    | 0,000   |
| FMNAT              | FMN adenylyltransferase                                     | h[c] + atp[c] + fmnc[c] -> ppi[c] + fad[c]                                                                                                                                              | 0,000    | 0,000   |
| FOR.DH             | Formate dehydrogenase (oxidoreductase)                      | for[c] + nad[c] <=> co2[c] + nadh[c]                                                                                                                                                    | -0,449   | 0,000   |
| FTHF.SYNT          | 10-formyltetrahydrofolate synthetase                        | for[c] + atp[c] + thf[c] -> pi[c] + adp[c] + 10fthf[c]                                                                                                                                  | 0,452    | 0,000   |
| FUM-M              | fumarase                                                    | h2o[m] + fum[m] <=> mal-L[m]                                                                                                                                                            | 0,411    | 0,704   |
| G3P.DH-H           | glyceraldehyde-3-phosphate dehydrogenase (Chloroplast)      | nadp[h] + pi[h] + g3p[h] <=> nadph[h] + h[h] + 13dpg[h]                                                                                                                                 | -81,038  | 1,056   |
| G3PD2              | glycerol-3-phosphate dehydrogenase (NADP)                   | nadp[c] + glylc3p[c] <=> nadph[c] + h[c] + dhap[c]                                                                                                                                      | 0,000    | 0,000   |
| G3PDH-H            | glyceraldehyde-3-phosphate dehydrogenase (Chloroplast)      | pi[h] + nad[h] + g3p[h] <=> h[h] + nadh[h] + 13dpg[h]                                                                                                                                   | 1,213    | 0,000   |

|                 |                                                            |                                                                                                                                                                |            |            |
|-----------------|------------------------------------------------------------|----------------------------------------------------------------------------------------------------------------------------------------------------------------|------------|------------|
| G3PDHirr        | glyceraldehyde-3-phosphate dehydrogenase (NADP+)           | $\text{h2o[c]} + \text{nadp[c]} + \text{g3p[c]} \rightarrow \text{nadph[c]} + 2 \text{ h[c]} + 3 \text{ pg[c]}$                                                | 0,000      | 0,000      |
| G6PDH2-H        | glucose 6-phosphate dehydrogenase (Chloroplast)            | $\text{nadp[h]} + \text{g6p[h]} \rightleftharpoons \text{nadph[h]} + \text{h[h]} + 6 \text{ pg[h]}$                                                            | 0,000      | 0,000      |
| G6PDH2r         | glucose 6-phosphate dehydrogenase                          | $\text{nadp[c]} + \text{g6p[c]} \rightleftharpoons \text{nadph[c]} + \text{h[c]} + 6 \text{ pg[c]}$                                                            | 0,000      | 0,000      |
| GALKr           | galactokinase                                              | $\text{atp[c]} + \text{gal[c]} \rightleftharpoons \text{h[c]} + \text{adp[c]} + \text{gal1p[c]}$                                                               | -0,991     | 0,000      |
| GALUrev         | UTP-glucose-1-phosphate uridylyltransferase                | $\text{h[c]} + \text{utp[c]} + \text{g1p[c]} \rightleftharpoons \text{ppi[c]} + \text{udpg[c]}$                                                                | 1,795      | 0,000      |
| GAPD            | glyceraldehyde-3-phosphate dehydrogenase                   | $\text{pi[c]} + \text{nad[c]} + \text{g3p[c]} \rightleftharpoons \text{h[c]} + \text{nadh[c]} + 13 \text{ dp[c]}$                                              | 4,098      | -0,352     |
| GARFT.ir        | phosphoribosylglycinamide formyltransferase (irreversible) | $10 \text{ fth[c]} + \text{gar[c]} \rightarrow \text{h[c]} + \text{thf[c]} + \text{fgam[c]}$                                                                   | 0,225      | 0,000      |
| GAI1P.UDP.TRANS | galactose-1-phosphate uridylyltransferase (cytoplasma)     | $\text{h[c]} + \text{utp[c]} + \text{gal1p[c]} \rightleftharpoons \text{ppi[c]} + \text{udpgal[c]}$                                                            | -0,991     | 0,000      |
| GCAL.DH         | Glycolaldehyde dehydrogenase                               | $\text{h2o[c]} + \text{nad[c]} + \text{gcald[c]} \rightarrow 2 \text{ h[c]} + \text{nadh[c]} + \text{glyclt[c]}$                                               | 0,001      | 0,000      |
| GHMT2r          | glycine hydroxymethyltransferase. 1                        | $\text{ser-L[c]} + \text{thf[c]} \rightleftharpoons \text{h2o[c]} + \text{gly[c]} + \text{mlthf[c]}$                                                           | 0,170      | 0,000      |
| GHMT2r-M        | glycine hydroxymethyltransferase (mitochondrion)           | $\text{thf[m]} + \text{ser-L[m]} \rightleftharpoons \text{h2o[m]} + \text{mlthf[m]} + \text{gly[m]}$                                                           | -0,006     | 0,000      |
| GK1             | guanylate kinase (GMP:ATP)                                 | $\text{atp[c]} + \text{gmp[c]} \rightleftharpoons \text{adp[c]} + \text{gdp[c]}$                                                                               | 0,039      | 0,000      |
| GLNS            | glutamine synthetase                                       | $\text{glu-L[c]} + \text{atp[c]} + \text{nh4[c]} \rightarrow \text{pi[c]} + \text{h[c]} + \text{gln-L[c]} + \text{adp[c]}$                                     | 0,000      | 0,000      |
| GLNS-H          | glutamine synthetase (chloroplast)                         | $\text{atp[h]} + \text{glu-L[h]} + \text{nh4[h]} \rightarrow \text{h[h]} + \text{adp[h]} + \text{pi[h]} + \text{gln-L[h]}$                                     | 0,000      | 0,000      |
| GLNS-M          | glutamine synthetase (mitochondrion)                       | $\text{atp[m]} + \text{glu-L[m]} + \text{nh4[m]} \rightarrow \text{h[m]} + \text{adp[m]} + \text{gln-L[m]} + \text{pi[m]}$                                     | 0,000      | 0,000      |
| GLUC(300).HYD   | 1.3-beta-D-glucan glucanohydrolase                         | $300 \text{ h2o[c]} + 13 \text{ glucan(300)[c]} \rightarrow 300 \text{ glc-D[c]}$                                                                              | 0,000      | 0,000      |
| GLUC.SYN(300)   | 1.3-beta-glucan synthase (300)                             | $299 \text{ udpg[c]} + \text{glc-D[c]} \rightarrow \text{h2o[c]} + 299 \text{ h[c]} + 13 \text{ glucan(300)[c]} + 299 \text{ udp[c]}$                          | 0,002      | 0,000      |
| GLUCYS          | gamma-glutamylcysteine synthetase                          | $\text{glu-L[c]} + \text{atp[c]} + \text{cys-L[c]} \rightarrow \text{pi[c]} + \text{h[c]} + \text{adp[c]} + \text{glucys[c]}$                                  | 0,000      | 0,000      |
| GLUDC           | Glutamate Decarboxylase                                    | $\text{h[c]} + \text{glu-L[c]} \rightarrow 4 \text{ abut[c]} + \text{co2[c]}$                                                                                  | 0,000      | 0,000      |
| GLUN.rev        | glutaminase (reversible)                                   | $\text{h2o[c]} + \text{gln-L[c]} \rightleftharpoons \text{glu-L[c]} + \text{nh4[c]}$                                                                           | -10000,000 | -10000,000 |
| GLUPRT          | glutamine phosphoribosyldiphosphate amidotransferase       | $\text{h2o[c]} + \text{gln-L[c]} + \text{prpp[c]} \rightarrow \text{ppi[c]} + \text{glu-L[c]} + \text{pram[c]}$                                                | 10000,000  | 10000,000  |
| GLUPRT.rev      | glutamine phosphoribosyldiphosphate amidotransferase       | $\text{h2o[c]} + \text{gln-L[c]} + \text{prpp[c]} \rightleftharpoons \text{ppi[c]} + \text{glu-L[c]} + \text{pram[c]}$                                         | -9999,775  | -10000,000 |
| GLURING         | Glutamate ring building                                    | $\text{glu5sa[c]} \rightleftharpoons \text{h2o[c]} + \text{h[c]} + 1 \text{ pyr5c[c]}$                                                                         | 0,058      | 0,000      |
| GLUSYN.irrev    | glutamate synthase (NADPH)                                 | $\text{nadph[c]} + \text{h[c]} + \text{akg[c]} + \text{gln-L[c]} \rightarrow \text{nadp[c]} + 2 \text{ glu-L[c]}$                                              | 9999,407   | 10000,000  |
| GLUT.P.RED      | beta-glutamylphosphate reductase                           | $\text{nadph[c]} + \text{h[c]} + \text{glu5p[c]} \rightleftharpoons \text{nadp[c]} + \text{pi[c]} + \text{glu5sa[c]}$                                          | 0,244      | 0,000      |
| GLUTKIN         | glutamate 5-kinase                                         | $\text{glu-L[c]} + \text{atp[c]} \rightleftharpoons \text{adp[c]} + \text{glu5p[c]}$                                                                           | 0,244      | 0,000      |
| GLUTSYNT        | Glutamate dehydrogenase (NadpH.) ; Glutamatesynthesis      | $\text{nadph[c]} + \text{h[c]} + \text{akg[c]} + \text{nh4[c]} \rightleftharpoons \text{h2o[c]} + \text{nadp[c]} + \text{glu-L[c]}$                            | -10000,000 | -10000,000 |
| GLUTSYNT2       | Glutamate dehydrogenase (NadH.) ; Glutamatesynthesis       | $\text{h[c]} + \text{akg[c]} + \text{nadh[c]} + \text{nh4[c]} \rightleftharpoons \text{h2o[c]} + \text{glu-L[c]} + \text{nad[c]}$                              | 2,846      | 0,000      |
| GLY.CLVG-M      | glycine cleavage (Mitochondrion)                           | $\text{nad[m]} + \text{thf[m]} + \text{gly[m]} \rightarrow \text{nadh[m]} + \text{co2[m]} + \text{mlthf[m]} + \text{nh4[m]}$                                   | 0,006      | 0,000      |
| GLYALD.OXIRED   | Glyceraldehyde oxidoreductase (NAD+)                       | $\text{h2o[c]} + \text{nad[c]} + \text{glyald[c]} \rightleftharpoons 2 \text{ h[c]} + \text{nadh[c]} + \text{glyc-R[c]}$                                       | 0,000      | 0,000      |
| GLYAT           | glycine C-acetyltransferase                                | $\text{gly[c]} + \text{accoa[c]} \rightleftharpoons \text{coa[c]} + 2 \text{ aobut[c]}$                                                                        | -0,102     | 0,000      |
| GLYC-R.KIN      | glycerate 3-kinase                                         | $\text{atp[c]} + \text{glyc-R[c]} \rightleftharpoons \text{h[c]} + \text{adp[c]} + 3 \text{ pg[c]}$                                                            | 0,000      | 0,000      |
| GLYC.OXIRED     | Glycerol oxidoreductas                                     | $\text{nad[c]} + \text{glyc[c]} \rightleftharpoons \text{h[c]} + \text{nadh[c]} + \text{glyald[c]}$                                                            | 0,000      | 0,000      |
| GLYCL           | Glycine Cleavage System                                    | $\text{gly[c]} + \text{nad[c]} + \text{thf[c]} \rightarrow \text{co2[c]} + \text{nadh[c]} + \text{nh4[c]} + \text{mlthf[c]}$                                   | 0,000      | 0,000      |
| GLYCLT.DH       | glycolate dehydrogenase (glycolate oxidase)                | $\text{o2[c]} + \text{glyclt[c]} \rightarrow \text{glx[c]} + \text{h2o2[c]}$                                                                                   | 0,093      | 0,000      |
| GMP.REDirr      | GMP reductase                                              | $\text{nadph[c]} + \text{h[c]} + \text{gmp[c]} \rightarrow \text{nadp[c]} + \text{nh3\_ [c]} + \text{imp[c]}$                                                  | 0,000      | 0,000      |
| GMP.SYNT        | GMP synthase                                               | $\text{h2o[c]} + \text{gln-L[c]} + \text{atp[c]} + \text{xmp[c]} \rightarrow \text{ppi[c]} + 2 \text{ h[c]} + \text{glu-L[c]} + \text{amp[c]} + \text{gmp[c]}$ | 0,039      | 0,000      |
| GOA             | Glycine:2-oxoglutarate aminotransferase                    | $\text{glu-L[c]} + \text{glx[c]} \rightarrow \text{akg[c]} + \text{gly[c]}$                                                                                    | 0,093      | 0,000      |

|                                  |                                                                                                                   |                                                                                                                                                                                    |           |            |
|----------------------------------|-------------------------------------------------------------------------------------------------------------------|------------------------------------------------------------------------------------------------------------------------------------------------------------------------------------|-----------|------------|
| GROWTH_log_200_16h_neutralcharge | Exportfunction of biomass (logarithmic growth. high irradiation 200müE in light phase) metabolite                 | biomass_log_200_16h_light_neutrcharge_final2[c] ->                                                                                                                                 | 0,000     | 0,000      |
| GROWTH_log_200_24h_neutralcharge | Exportfunction of biomass (logarithmic growth. high irradiation 200µE) metabolite                                 | biomass_log_200_24h_neutrcharge_final[c] ->                                                                                                                                        | 0,000     | 0,000      |
| GROWTH_log_50_16h_neutralcharge  | Exportfunction of biomass (logarithmic growth. low irradiation 50µE) metabolite                                   | biomass_log_50_16h_neutrcharge_final[c] ->                                                                                                                                         | 0,000     | 0,000      |
| GROWTH_log_50_24h_neutralcharge  | Exportfunction of biomass (logarithmic growth. low irradiation 50µE) metabolite                                   | biomass_log_50_24h_neutrcharge_final[c] ->                                                                                                                                         | 0,000     | 0,000      |
| GTHOrev                          | glutathione oxidoreductase                                                                                        | nadph[c] + h[c] + gthox[c] <=> nadp[c] + 2 gthrd[c]                                                                                                                                | -9999,931 | -10000,000 |
| GTHOrev2                         | glutathione oxidoreductase (nadh)                                                                                 | h[c] + nadh[c] + gthox[c] <=> nad[c] + 2 gthrd[c]                                                                                                                                  | 10000,000 | 10000,000  |
| GTHRD.PEROX                      | glutathione peroxidase                                                                                            | h2o2[c] + 2 gthrd[c] -> 2 h2o[c] + gthox[c]                                                                                                                                        | 0,069     | 0,000      |
| GTHS                             | glutathione synthetase                                                                                            | atp[c] + gly[c] + glucys[c] -> pi[c] + h[c] + adp[c] + gthrd[c]                                                                                                                    | 0,000     | 0,000      |
| GTPCI                            | GTP cyclohydrolase I                                                                                              | h2o[c] + gtp[c] -> for[c] + h[c] + ahdtd[c]                                                                                                                                        | 0,001     | 0,000      |
| H2O.EQ                           | h2o equilibrium                                                                                                   | h[c] + oh[c] <=> h2o[c]                                                                                                                                                            | 0,001     | 0,000      |
| HCO3E                            | HCO3 equilibration reaction                                                                                       | h2o[c] + co2[c] <=> h[c] + hco3[c]                                                                                                                                                 | 24,461    | 11,760     |
| HCO3E-M                          | HCO3 equilibration reaction                                                                                       | h2o[m] + co2[m] <=> h[m] + hco3[m]                                                                                                                                                 | 0,000     | 0,000      |
| HEX1                             | hexokinase (D-glucose:ATP)                                                                                        | atp[c] + glc-D[c] -> h[c] + adp[c] + g6p[c]                                                                                                                                        | 0,000     | 0,000      |
| HEX4                             | hexokinase (D-mannose:ATP)                                                                                        | atp[c] + man[c] -> h[c] + adp[c] + man6p[c]                                                                                                                                        | 0,000     | 0,352      |
| HISTDH                           | histidinol dehydrogenase                                                                                          | h2o[c] + 2 nad[c] + histd[c] -> 3 h[c] + 2 nadh[c] + his-L[c]                                                                                                                      | 0,001     | 0,000      |
| HISTP                            | histidinol-phosphatase                                                                                            | h2o[c] + hisp[c] -> pi[c] + histd[c]                                                                                                                                               | 0,001     | 0,000      |
| HPPK                             | 7.8-Dihydro-6-hydroxymethylpterin-pyrophosphokinase                                                               | atp[c] + dhpterin[c] -> h[c] + amp[c] + dhpterin.pp[c]                                                                                                                             | 0,001     | 0,000      |
| HSDy                             | homoserine dehydrogenase (NADPH)                                                                                  | nadp[c] + hom-L[c] <=> nadph[c] + h[c] + aspsa[c]                                                                                                                                  | -0,247    | 0,000      |
| HSK                              | homoserine kinase                                                                                                 | atp[c] + hom-L[c] -> h[c] + adp[c] + phom[c]                                                                                                                                       | 0,247     | 0,000      |
| HSTPT                            | histidinol-phosphate transaminase                                                                                 | glu-L[c] + imacp[c] -> akc[c] + hisp[c]                                                                                                                                            | 0,001     | 0,000      |
| IC.DH-M                          | isocitrate dehydrogenase (NAD) (Mitochondrion)                                                                    | icit[m] + nad[m] <=> nadh[m] + co2[m] + akc[m]                                                                                                                                     | 9,421     | 1,760      |
| IC.DH1-M                         | isocitrate dehydrogenase (NADP) (mitochondrion)                                                                   | icit[m] + nadp[m] <=> co2[m] + nadph[m] + akc[m]                                                                                                                                   | -8,975    | -1,056     |
| IGP.SYNT                         | Imidazole glycerol phosphate synthase                                                                             | gln-L[c] + prlp[c] <=> h[c] + glu-L[c] + aicar[c] + eig3p[c]                                                                                                                       | 0,001     | 0,000      |
| IGPDH                            | imidazoleglycerol-phosphate dehydratase                                                                           | eig3p[c] -> h2o[c] + imacp[c]                                                                                                                                                      | 0,001     | 0,000      |
| ILETA                            | isoleucine transaminase                                                                                           | akc[c] + ile-L[c] <=> glu-L[c] + 3mop[c]                                                                                                                                           | -0,040    | 0,000      |
| IMP.SYNT                         | AICAR formyltransferase (IMP Biosynthesis)                                                                        | aicar[c] + 10fthf[c] <=> h2o[c] + imp[c] + thf[c]                                                                                                                                  | 0,227     | 0,000      |
| IMPD                             | IMP dehydrogenase                                                                                                 | h2o[c] + nad[c] + imp[c] -> h[c] + nadh[c] + xmp[c]                                                                                                                                | 0,039     | 0,000      |
| INOST.SYNT                       | Inositol Synthetase                                                                                               | h2o[c] + g6p[c] -> pi[c] + inost[c]                                                                                                                                                | 0,003     | 0,000      |
| IPMLATDH2                        | 3-isopropylmalate dehydrogenase                                                                                   | nad[c] + 3c2hmp[c] <=> co2[c] + nadh[c] + 4mop[c]                                                                                                                                  | 0,102     | 0,000      |
| IPMLATHYDLY                      | 3-isopropylmalate hydrolyase                                                                                      | 3c3hmp[c] <=> 3c2hmp[c]                                                                                                                                                            | 0,102     | 0,000      |
| IPMLATSYNT                       | 2-isopropylmalate synthetase                                                                                      | h2o[c] + 3mob[c] + accoa[c] <=> h[c] + coa[c] + 3c3hmp[c]                                                                                                                          | 0,102     | 0,000      |
| Import_log_200i_8h_dark          | Night Metabolism during 8h dark phase of high irradiated (during day) E.hux in log growth [g Metab / (g DCW* hr)] | 0.015607 lcm.biomass2.1[e] + 0.0045351 lipid.biomass5.[e] + 0.0020506 lmwm.biomass[e] -> 0.0045351 lipid.biomass5.[c] + 0.015607 lcm.biomass2.1[c] + 0.0020506 lmwm.biomass[c]     | 0,000     | 0,000      |
| Import_log_50i_8h_dark           | Night Metabolism during 8h dark phase of low irradiated (during day) E.hux in log growth [g Metab / (g DCW* hr)]  | 0.0045958 lcm.biomass2.1[e] + 0.00012431 lipid.biomass5.[e] + 0.0070444 lmwm.biomass[e] -> 0.00012431 lipid.biomass5.[c] + 0.0045958 lcm.biomass2.1[c] + 0.0070444 lmwm.biomass[c] | 0,000     | 0,000      |
| KARA2                            | ketol-acid reductoisomerase (2-Acetolactate)                                                                      | nadph[c] + h[c] + 2ahbut[c] <=> nadp[c] + 23dhmp[c]                                                                                                                                | 0,040     | 0,000      |

|                         |                                                                         |                                                                                                                                                                                                                                                                 |        |        |
|-------------------------|-------------------------------------------------------------------------|-----------------------------------------------------------------------------------------------------------------------------------------------------------------------------------------------------------------------------------------------------------------|--------|--------|
| LCM.BIOM1.6             | Long Chain Molecules Biomass                                            | 0.33771 h2o[c] + 0.10421 gtp[c] + 0.058616 atp[c] + 0.058616 utp[c] + 0.10421 ctp[c] + 0.0064079 13glucan(300)[c] + 0.0021191 datp[c] + 0.0021191 dttp[c] + 0.0039356 dctp[c] + 0.0039356 dgtp[c] -> 0.33771 ppi[c] + lcm.biomass2.1[c]                         | 0,339  | 0,000  |
| LCM.DEGRAD              | Long Chain Molecules Degradation                                        | lcm.biomass2.1[c] -> 0.0064079 13glucan(300)[c]                                                                                                                                                                                                                 | 0,000  | 0,000  |
| LEUSYNT                 | branched-chain aminotransferase (Leucin biosynthesis)                   | glu-L[c] + 4mop[c] <=> akc[c] + leu-L[c]                                                                                                                                                                                                                        | 0,102  | 0,000  |
| LIPASE.LIPID.BIOM_final | Lipase of Lipid.biom2.1; lipid composition after 7 days of growth (log) | 1.1539 h2o[c] + lipid.biomass5.[c] -> 0.26699 gal[c] + 0.029625 etha[c] + 0.058754 glycp[c] + 0.37925 gly[c] + 0.83705 fa.replace_d[c]                                                                                                                          | 0,000  | 0,000  |
| LIPID.BIOM3             | Lipid biomass (log)                                                     | lipid.chloroplast2[c] + -> lipid.biomass5.[c]                                                                                                                                                                                                                   | 0,510  | 0,000  |
| LIPID.CHLORO-H          | Lipid biomass (log) (Chloroplastide)                                    | 0.25358 h2o[h] + 0.0036923 fa.replace_d[h] + 0.52305 fa-coa.replace_i[h] + 0.25888 g3p[h] + 0.011987 ctp[h] + 0.033764 udp-sqv[h] + 0.26699 udpgal[h] -> 0.52305 coa[h] + 0.26699 pi[h] + 0.011987 cmp[h] + 0.30075 udp[h] + lipid.chloroplast2[h]              | 0,510  | 0,000  |
| LIPID.ER                | Lipid biomass (log) (endoplasmatic reticulum)                           | 0.15515 h2o[r] + 0.15515 g3p[r] + 0.3103 fa-coa.replace_i[r] + 0.15515 ctp[r] + 0.13801 ser-L[r] + 0.0051541 inost[r] + 0.32515 amet[r] -> 0.14316 ppi[r] + 0.023975 pi[r] + 0.3103 coa[r] + 0.13801 co2[r] + 0.15515 cmp[r] + 0.32515 hcys-L[r] + lipid.er4[r] | 0,510  | 0,000  |
| LMWM.BIOM               | Low Molecular Weight Metabolites Biomass                                | 0.000223 chor[c] + 0.52414 arab-L[c] + 0.6969 gal[c] + 0.000223 thf[c] + 0.000223 ribflv[c] + 0.000223 fad[c] + 0.000223 10thf[c] + 0.000223 mlthf[c] + 0.32836 man6p[c] + 0.000223 5mthf[c] -> lmwm.biomass[c]                                                 | 1,422  | 0,000  |
| LMWM.DEGRAD             | Low Molecular Weight Metabolites Degradation                            | lmwm.biomass[c] -> 0.000223 chor[c] + 0.52414 arab-L[c] + 0.6969 gal[c] + 0.32836 man6p[c]                                                                                                                                                                      | 0,000  | 0,000  |
| M1PD                    | mannitol-1-phosphate 5-dehydrogenase                                    | nad[c] + mnl1p[c] <=> h[c] + nadh[c] + f6p[c]                                                                                                                                                                                                                   | -0,352 | 0,000  |
| M1Pase_irrev            | Mannitol-1-phosphatase                                                  | h2o[c] + mnl1p[c] -> pi[c] + mnl[c]                                                                                                                                                                                                                             | 0,352  | 0,000  |
| MAIN.BIOM2              | ATP maintenance (growth-associated)                                     | 39.24 h2o[c] + 39.24 atp[c] -> 39.24 pi[c] + 39.24 h[c] + 39.24 adp[c] + main.biomass1[c]                                                                                                                                                                       | 0,924  | 0,000  |
| MAL.DH                  | Malate dehydrogenase                                                    | nad[m] + mal-L[m] -> nadh[m] + co2[m] + pyr[m]                                                                                                                                                                                                                  | 0,000  | 0,000  |
| MAN6PI                  | mannose-6-phosphate isomerase                                           | man6p[c] <=> f6p[c]                                                                                                                                                                                                                                             | -0,467 | 0,352  |
| MDH-M                   | malate dehydrogenase                                                    | nad[m] + mal-L[m] <=> nadh[m] + h[m] + oaa[m]                                                                                                                                                                                                                   | 0,411  | 0,704  |
| METAT                   | methionine adenosyltransferase                                          | h2o[c] + atp[c] + met-L[c] -> ppi[c] + pi[c] + amet[c]                                                                                                                                                                                                          | 0,166  | 0,000  |
| METS                    | methionine synthase                                                     | hcys-L[c] + 5mthf[c] -> h[c] + thf[c] + met-L[c]                                                                                                                                                                                                                | 0,169  | 0,000  |
| MTHF.RED2ir             | methylenetetrahydrofolate reductase (NADPH                              | nadph[c] + 2 h[c] + mlthf[c] -> nadp[c] + 5mthf[c]                                                                                                                                                                                                              | 0,169  | 0,000  |
| MnlDH_rev               | mannitol dehydrogenase                                                  | nad[c] + mnl[c] <=> h[c] + nadh[c] + man[c]                                                                                                                                                                                                                     | 0,000  | 0,352  |
| NDPK1                   | nucleoside-diphosphate kinase (ATP:GDP)                                 | atp[c] + gdp[c] <=> gtp[c] + adp[c]                                                                                                                                                                                                                             | -6,255 | -0,704 |
| NDPK2                   | nucleoside-diphosphate kinase (ATP:UDP)                                 | atp[c] + udp[c] <=> adp[c] + utp[c]                                                                                                                                                                                                                             | 0,859  | 0,000  |
| NDPK3                   | nucleoside-diphosphate kinase (ATP:CDP)                                 | atp[c] + cdp[c] <=> adp[c] + ctp[c]                                                                                                                                                                                                                             | 0,085  | 0,000  |
| NDPK4                   | nucleoside-diphosphate kinase (ATP:dTDP)                                | atp[c] + dtdp[c] <=> adp[c] + dttp[c]                                                                                                                                                                                                                           | 0,001  | 0,000  |
| NDPK5                   | nucleoside-diphosphate kinase (ATP:dGDP)                                | atp[c] + dgdp[c] <=> adp[c] + dgtp[c]                                                                                                                                                                                                                           | 0,001  | 0,000  |
| NDPK6                   | nucleoside-diphosphate kinase (ATP:dUDP)                                | atp[c] + dudp[c] <=> adp[c] + dutp[c]                                                                                                                                                                                                                           | 0,000  | 0,000  |
| NDPK7                   | nucleoside-diphosphate kinase (ATP:dCDP)                                | atp[c] + dcdp[c] <=> adp[c] + dctp[c]                                                                                                                                                                                                                           | 0,001  | 0,000  |
| NDPK8                   | nucleoside-diphosphate kinase (ATP:dADP)                                | atp[c] + dadp[c] <=> adp[c] + datp[c]                                                                                                                                                                                                                           | 0,001  | 0,000  |
| NGAM2                   | non growth associated maintenance                                       | 1.5 h2o[c] + 1.5 atp[c] -> 1.5 pi[c] + 1.5 h[c] + 1.5 adp[c] + ngam[c]                                                                                                                                                                                          | 0,000  | 0,000  |
| NH4.EQ                  | Ammonium ammonia equilibrium (cytoplasma)                               | nh3_[c] + h[c] <=> nh4[c]                                                                                                                                                                                                                                       | -0,815 | 0,000  |
| NH4.EQ-H                | Ammonium equilibrium reaction (chloroplastide)                          | h[h] + nh3_[h] <=> nh4[h]                                                                                                                                                                                                                                       | 0,000  | 0,000  |
| NO2.RED-H               | nitrite reductase (chloroplastides)                                     | 7 h[h] + 6 redfer1[h] + no2[h] -> 2 h2o[h] + 6 oxfer[h] + nh3_[h]                                                                                                                                                                                               | 0,000  | 0,000  |
| NO3.RED                 | nitrate reductase                                                       | h[c] + nadh[c] + no3[c] -> h2o[c] + nad[c] + no2[c]                                                                                                                                                                                                             | 0,000  | 0,000  |
| NTD11                   | 5'-nucleotidase (IMP)                                                   | h2o[c] + imp[c] -> pi[c] + ins[c]                                                                                                                                                                                                                               | 0,188  | 0,000  |
| NTD7                    | 5'-nucleotidase (AMP)                                                   | h2o[c] + amp[c] -> pi[c] + adn[c]                                                                                                                                                                                                                               | 0,000  | 0,000  |
| NTP1                    | nucleoside-triphosphatase (ATP)                                         | h2o[c] + atp[c] -> pi[c] + h[c] + adp[c]                                                                                                                                                                                                                        | 0,000  | 0,000  |
| NTP3                    | nucleoside-triphosphatase (GTP)                                         | h2o[c] + gtp[c] -> pi[c] + h[c] + gdp[c]                                                                                                                                                                                                                        | 0,000  | 0,000  |
| NTP5                    | nucleoside-triphosphatase (CTP)                                         | h2o[c] + ctp[c] -> pi[c] + h[c] + cdp[c]                                                                                                                                                                                                                        | 0,000  | 0,000  |

|                     |                                                            |                                                                                             |        |        |
|---------------------|------------------------------------------------------------|---------------------------------------------------------------------------------------------|--------|--------|
| NTPP7               | Nucleoside triphosphate pyrophosphorylase (dttp)           | h2o[c] + dttp[c] -> ppi[c] + h[c] + dtmp[c]                                                 | 0,000  | 0,000  |
| NTPP8               | Nucleoside triphosphate pyrophosphorylase (utp)            | h2o[c] + utp[c] -> ppi[c] + h[c] + ump[c]                                                   | 0,000  | 0,000  |
| OCTrans.irrev       | ornithine carbamoyltransferase                             | orni[c] + cbp[c] -> pi[c] + h[c] + citr-L[c]                                                | 0,186  | 0,000  |
| OMPDC               | orotidine-5'-phosphate decarboxylase                       | h[c] + orot5p[c] -> co2[c] + ump[c]                                                         | 0,057  | 0,000  |
| ORN.AM.TRANS        | ornithine aminotransferase                                 | glu-L[c] + glu5sa[c] <=> akgl[c] + orni[c]                                                  | 0,186  | 0,000  |
| ORPT                | orotate phosphoribosyltransferase                          | ppi[c] + orot5p[c] <=> orot[c] + prpp[c]                                                    | -0,057 | 0,000  |
| OXDHC               | 2 oxoglutarate Dehydrogenase complex                       | coa[m] + nad[m] + akgl[m] -> nadh[m] + co2[m] + succoa[m]                                   | 0,000  | 0,704  |
| Ox_Phosph(FADH)i-M  | overall Oxidative phosphorylation for FADH in mitochondria | 15 h[m] + 10 fadh2[m] + 15 adp[m] + 15 pi[m] + 5 o2[m] -> 15 atp[m] + 25 h2o[m] + 10 fad[m] | 0,000  | 0,070  |
| Ox_Phosph(NADH)2i-M | overall Oxidative phosphorylation for NADH in mitochondria | 10 nadh[m] + 34 h[m] + 24 adp[m] + 24 pi[m] + 5 o2[m] -> 24 atp[m] + 10 nad[m] + 34 h2o[m]  | 1,418  | 0,387  |
| PC-C                | pyruvate carboxylase                                       | pyr[c] + atp[c] + hco3[c] -> pi[c] + h[c] + oaa[c] + adp[c]                                 | 0,941  | 0,000  |
| PDH-H               | pyruvate dehydrogenase Complex (Chloroplastide)            | coa[h] + nad[h] + pyr[h] -> accoa[h] + nadh[h] + co2[h]                                     | 0,000  | 0,000  |
| PDH-M               | pyruvate dehydrogenase Complex                             | coa[m] + nad[m] + pyr[m] -> accoa[m] + nadh[m] + co2[m]                                     | 4,337  | 0,704  |
| PEP.TRANS.P.2       | Phosphoenolpyruvate transphosphorylase                     | h[c] + pep[c] + gdp[c] -> gtp[c] + pyr[c]                                                   | 6,292  | 0,000  |
| PEP.TRANS.P3        | phosphoenolpyruvate transphosphorylase                     | h[c] + pep[c] + dadp[c] -> pyr[c] + datp[c]                                                 | 0,000  | 0,000  |
| PEP.TRANS.P4        | phosphoenolpyruvate transphosphorylase                     | h[c] + pep[c] + dgdp[c] -> pyr[c] + dgtp[c]                                                 | 0,000  | 0,000  |
| PFK                 | phosphofructokinase                                        | atp[c] + f6p[c] -> h[c] + adp[c] + fdp[c]                                                   | 0,000  | 0,352  |
| PFK-H               | phosphofructokinase (Chloroplast)                          | atp[h] + f6p[h] -> h[h] + adp[h] + fdp[h]                                                   | 0,000  | 0,000  |
| PGD                 | phosphogluconate dehydrogenase (cytoplasm)                 | nadp[c] + 6pgc[c] -> nadph[c] + co2[c] + ru5p-D[c]                                          | 0,000  | 0,000  |
| PGD-H               | phosphogluconate dehydrogenase (Chloroplast)               | nadp[h] + 6pgc[h] -> nadph[h] + co2[h] + ru5p-D[h]                                          | 0,000  | 0,000  |
| PGI                 | glucose-6-phosphate isomerase                              | g6p[c] <=> f6p[c]                                                                           | -1,798 | 0,000  |
| PGI-H               | glucose-6-phosphate isomerase                              | g6p[h] <=> f6p[h]                                                                           | 0,000  | 0,000  |
| PGK                 | phosphoglycerate kinase                                    | atp[c] + 3pg[c] <=> adp[c] + 13dpg[c]                                                       | -4,098 | 0,352  |
| PGKrev-H            | phosphoglycerate kinase (chloroplast)                      | atp[h] + 3pg[h] <=> adp[h] + 13dpg[h]                                                       | 79,826 | -1,056 |
| PGL                 | 6-phosphogluconolactonase                                  | h2o[c] + 6pgl[c] -> h[c] + 6pgc[c]                                                          | 0,000  | 0,000  |
| PGL-H               | 6-phosphogluconolactonase (Chloroplast)                    | h2o[h] + 6pgl[h] -> h[h] + 6pgc[h]                                                          | 0,000  | 0,000  |
| PGLYCP-H            | Phosphoglycolate phosphatase (Chloroplast)                 | h2o[h] + 2pglyc[h] -> pi[h] + glyclt[h]                                                     | 0,091  | 0,000  |
| PGM                 | phosphoglycerate mutase                                    | 2pg[c] <=> 3pg[c]                                                                           | -4,098 | 0,352  |
| PGM-H               | phosphoglycerate mutase (chloroplastide)                   | 2pg[h] <=> 3pg[h]                                                                           | -2,288 | -1,056 |
| PGMT                | phosphoglucomutase                                         | g1p[c] <=> g6p[c]                                                                           | -1,795 | 0,000  |
| PHETA1              | phenylalanine transaminase                                 | akgl[c] + phe-L[c] <=> glu-L[c] + phpyr[c]                                                  | -0,042 | 0,000  |
| PPCK                | phosphoenolpyruvate carboxykinase                          | oaa[c] + atp[c] -> co2[c] + adp[c] + pep[c]                                                 | 0,000  | 0,000  |
| PPI.PHOS            | Pyrophosphatase                                            | h2o[c] + ppi[c] -> 2 pi[c] + h[c]                                                           | 2,185  | 0,000  |
| PR.ATP.DIPHOS       | phosphoribosyl-ATP diphosphatase                           | h2o[c] + prbatp[c] <=> ppi[c] + h[c] + prbamp[c]                                            | 0,001  | 0,000  |
| PRAGSr.ir           | phosphoribosylglycinamide synthase                         | atp[c] + gly[c] + pram[c] -> pi[c] + h[c] + adp[c] + gar[c]                                 | 0,225  | 0,000  |
| PRAI.C.rev          | phosphoribosylaminoimidazole carboxylase (reversible)      | co2[c] + air[c] <=> h[c] + 5aizc[c]                                                         | 0,225  | 0,000  |
| PRAI.SYNT           | phosphoribosylaminoimidazole synthase                      | atp[c] + fpram[c] -> pi[c] + 2 h[c] + adp[c] + air[c]                                       | 0,225  | 0,000  |
| PRAMP.CYCL          | phosphoribosyl-AMP cyclohydrolase                          | h2o[c] + prbamp[c] <=> prfp[c]                                                              | 0,001  | 0,000  |
| PRASCS              | phosphoribosylaminoimidazolesuccinocarboxamide synthase    | asp-L[c] + atp[c] + 5aizc[c] -> pi[c] + h[c] + adp[c] + 25aics[c]                           | 0,225  | 0,000  |
| PREDH2              | prephenate dehydrogenase                                   | nad[c] + pphn[c] <=> co2[c] + nadh[c] + 34hpp[c]                                            | 0,001  | 0,000  |
| PREDHA              | prephenate dehydratase                                     | h[c] + pphn[c] <=> h2o[c] + co2[c] + phpyr[c]                                               | 0,042  | 0,000  |
| PRFGS               | phosphoribosylformylglycinamide synthase                   | h2o[c] + gln-L[c] + atp[c] + fgam[c] -> pi[c] + h[c] + glu-L[c] + adp[c] + fpram[c]         | 0,225  | 0,000  |

|                 |                                                                                                   |                                                                                                                                                                                                                                                                                                                                                                                                                                                       |           |            |
|-----------------|---------------------------------------------------------------------------------------------------|-------------------------------------------------------------------------------------------------------------------------------------------------------------------------------------------------------------------------------------------------------------------------------------------------------------------------------------------------------------------------------------------------------------------------------------------------------|-----------|------------|
| PRKB-H          | phosphoribulokinas (Chloroplast)                                                                  | atp[h] + ru5p-D[h] -> h[h] + adp[h] + r15bp[h]                                                                                                                                                                                                                                                                                                                                                                                                        | 41,103    | 0,000      |
| PRMICI          | 1-(5-phosphoribosyl)-5-[[5-phosphoribosylamino)methylideneamino]imidazole-4-carboxamide isomerase | prfp[c] <=> prlp[c]                                                                                                                                                                                                                                                                                                                                                                                                                                   | 0,001     | 0,000      |
| PROLSYNT3       | proline oxidase (prolin biosynthesis)                                                             | 2 h[c] + nadh[c] + 1pyr5c[c] <=> nad[c] + pro-L[c]                                                                                                                                                                                                                                                                                                                                                                                                    | -9999,942 | -10000,000 |
| PROLSYNT4       | proline oxidase (prolin biosynthesis)                                                             | nadph[c] + 2 h[c] + 1pyr5c[c] <=> nadp[c] + pro-L[c]                                                                                                                                                                                                                                                                                                                                                                                                  | 10000,000 | 10000,000  |
| PROT.BIOM1.6    | Protein Biomass; autotroph Clamyd. Rein                                                           | 0.067831 asp-L[c] + 0.081155 glu-L[c] + 0.081155 gln-L[c] + 0.27375 ala-L[c] + 0.10296 gly[c] + 0.1502 arg-L[c] + 0.067831 asn-L[c] + 0.0024225 cys-L[c] + 0.020592 ser-L[c] + 0.018169 lys-L[c] + 0.0012113 his-L[c] + 0.032704 ile-L[c] + 0.082366 leu-L[c] + 0.0024225 met-L[c] + 0.033916 phe-L[c] + 0.047239 pro-L[c] + 0.082366 thr-L[c] + 0.0012113 trp-L[c] + 0.0012113 tyr-L[c] + 0.059352 val-L[c] -> 1.2101 h2o[c] + protein.biomass1.6[c] | 1,237     | 0,000      |
| PROT.DEGRADi    | Protein Degradation (irreversible. only AS which could be catabolized)                            | 1.2101 h2o[c] + protein.biomass1.6[c] -> 0.0678 asp-L[c] + 0.0812 glu-L[c] + 0.0812 gln-L[c] + 0.2738 ala-L[c] + 0.103 gly[c] + 0.0678 asn-L[c] + 0.0024 cys-L[c] + 0.0206 ser-L[c] + 0.0472 pro-L[c] + 0.0824 thr-L[c] + 0.0012 trp-L[c]                                                                                                                                                                                                             | 0,000     | 0,000      |
| PRPP.ATP.TRANS  | ATP phosphoribosyltransferase                                                                     | ppi[c] + prbatp[c] <=> atp[c] + prpp[c]                                                                                                                                                                                                                                                                                                                                                                                                               | -0,001    | 0,000      |
| PRPPS           | phosphoribosylpyrophosphate synthetase                                                            | atp[c] + r5p[c] <=> h[c] + amp[c] + prpp[c]                                                                                                                                                                                                                                                                                                                                                                                                           | 0,285     | 0,000      |
| PYK             | pyruvate kinase                                                                                   | h[c] + adp[c] + pep[c] -> pyr[c] + atp[c]                                                                                                                                                                                                                                                                                                                                                                                                             | 0,000     | 0,000      |
| PYK-H           | pyruvate kinase (chloroplastide)                                                                  | h[h] + adp[h] + pep[h] -> atp[h] + pyr[h]                                                                                                                                                                                                                                                                                                                                                                                                             | 0,000     | 0,704      |
| Photoreduction2 | Photoreduction / lightreaction (extracellular to chloroplastide)                                  | h[c] + 2 nadp[h] + 3 adp[h] + 3 pi[h] + 8 hn[h] -> h2o[c] + 3 atp[h] + 2 nadph[h] + o2[h]                                                                                                                                                                                                                                                                                                                                                             | 48,480    | 0,000      |
| RBFK            | riboflavin kinase                                                                                 | atp[c] + ribflv[c] -> h[c] + adp[c] + fmn[c]                                                                                                                                                                                                                                                                                                                                                                                                          | 0,000     | 0,000      |
| RBL.P.TRANS     | D-ribulose 5-phosphotransferase                                                                   | h[c] + adp[c] + ru5p-D[c] <=> atp[c] + rbl-L[c]                                                                                                                                                                                                                                                                                                                                                                                                       | 0,745     | 0,000      |
| REDISO          | reductoisomerase                                                                                  | nadph[c] + h[c] + oxbutat[c] <=> nadp[c] + 23dhmb[c]                                                                                                                                                                                                                                                                                                                                                                                                  | 0,175     | 0,000      |
| RIBFLV.SYNT     | riboflavin synthase                                                                               | 2 dmlz[c] -> 4r5au[c] + ribflv[c]                                                                                                                                                                                                                                                                                                                                                                                                                     | 0,001     | 0,000      |
| RNDR1           | ribonucleoside-diphosphate reductase (ADP)                                                        | adp[c] + trdrd[c] -> h2o[c] + dadp[c] + trdox[c]                                                                                                                                                                                                                                                                                                                                                                                                      | 0,001     | 0,000      |
| RNDR2           | ribonucleoside-diphosphate reductase (GDP)                                                        | gdp[c] + trdrd[c] -> h2o[c] + dgdpc[c] + trdox[c]                                                                                                                                                                                                                                                                                                                                                                                                     | 0,001     | 0,000      |
| RNDR3           | ribonucleoside-diphosphate reductase (CDP)                                                        | cdp[c] + trdrd[c] -> h2o[c] + dcdpc[c] + trdox[c]                                                                                                                                                                                                                                                                                                                                                                                                     | 0,000     | 0,000      |
| RNDR4           | ribonucleoside-diphosphate reductase (UDP)                                                        | udp[c] + trdrd[c] -> h2o[c] + dudpc[c] + trdox[c]                                                                                                                                                                                                                                                                                                                                                                                                     | 0,002     | 0,000      |
| RPE             | ribulose 5-phosphate 3-epimerase                                                                  | ru5p-D[c] <=> xu5p-D[c]                                                                                                                                                                                                                                                                                                                                                                                                                               | -0,703    | 0,000      |
| RPE-H           | ribulose 5-phosphate 3-epimerase (Chloroplast)                                                    | ru5p-D[h] <=> xu5p-D[h]                                                                                                                                                                                                                                                                                                                                                                                                                               | -27,402   | 0,000      |
| RPI             | ribose-5-phosphate isomerase                                                                      | r5p[c] <=> ru5p-D[c]                                                                                                                                                                                                                                                                                                                                                                                                                                  | 0,043     | 0,000      |
| RPI-H           | ribose-5-phosphate isomerase (Chloroplast)                                                        | r5p[h] <=> ru5p-D[h]                                                                                                                                                                                                                                                                                                                                                                                                                                  | 13,701    | 0,000      |
| RubisCO-H       | RubisCO Co2 fixation                                                                              | h2o[h] + co2[h] + r15bp[h] -> 2 h[h] + 2 3pg[h]                                                                                                                                                                                                                                                                                                                                                                                                       | 41,011    | 0,000      |
| RubisOX-H       | RubisOX Photorespiration                                                                          | o2[h] + r15bp[h] -> 2 h[h] + 3pg[h] + 2pglyc[h]                                                                                                                                                                                                                                                                                                                                                                                                       | 0,091     | 0,000      |
| SATase-M        | L-serine acetyltransferase (Mitochondrium)                                                        | accoa[m] + ser-L[m] <=> coa[m] + acser[m]                                                                                                                                                                                                                                                                                                                                                                                                             | 0,006     | 0,000      |
| SBPASEir        | sedoheptulose-bisphosphatase                                                                      | h2o[c] + s17bp[c] -> pi[c] + s7p[c]                                                                                                                                                                                                                                                                                                                                                                                                                   | 0,000     | 0,000      |
| SBPASEir-H      | sedoheptulose-bisphosphatase (Chloroplast)                                                        | h2o[h] + s17bp[h] -> pi[h] + s7p[h]                                                                                                                                                                                                                                                                                                                                                                                                                   | 27,402    | 0,000      |
| SER.DEAM        | serine deaminase                                                                                  | ser-L[c] <=> nh3_[c] + h[c] + pyr[c]                                                                                                                                                                                                                                                                                                                                                                                                                  | -0,264    | 0,000      |
| SERSYNir        | Serin biosynthesis                                                                                | h2o[c] + glu-L[c] + nad[c] + 3pg[c] -> pi[c] + h[c] + akc[c] + nadh[c] + ser-L[c]                                                                                                                                                                                                                                                                                                                                                                     | 0,000     | 0,000      |
| SSAL.DH         | succinate-semialdehyde dehydrogenase (NADP)                                                       | h2o[c] + nadp[c] + succal[c] <=> nadph[c] + 2 h[c] + succ[c]                                                                                                                                                                                                                                                                                                                                                                                          | 0,000     | 0,000      |
| SUCD-M          | succinate dehydrogenase (FAD)                                                                     | fad[m] + succ[m] <=> fadh2[m] + fum[m]                                                                                                                                                                                                                                                                                                                                                                                                                | 0,000     | 0,704      |
| SUCOAS-M        | succinyl-CoA synthetase (GDP-forming)                                                             | coa[m] + succ[m] + gtp[m] <=> pi[m] + succoa[m] + gdp[m]                                                                                                                                                                                                                                                                                                                                                                                              | 0,000     | -0,704     |
| SUCR.HYLA       | sucrose glucohydrolase                                                                            | h2o[c] + sucr[c] -> fru[c] + glc-D[c]                                                                                                                                                                                                                                                                                                                                                                                                                 | 0,002     | 0,000      |
| SUCR.SYNT       | sucrose synthase                                                                                  | fru[c] + udpg[c] -> h[c] + udp[c] + sucr[c]                                                                                                                                                                                                                                                                                                                                                                                                           | 0,002     | 0,000      |
| SULFOX          | "                                                                                                 | h2o[c] + o2[c] + so3[c] <=> h2o2[c] + so4[c]                                                                                                                                                                                                                                                                                                                                                                                                          | -0,023    | 0,000      |
| SULFRED-M       | sulfite reductase (ferredoxin) (Mitochondrium)                                                    | 8 h[m] + 6 redfer1[m] + so3[m] <=> 3 h2o[m] + h2s[m] + 6 oxfer[m]                                                                                                                                                                                                                                                                                                                                                                                     | -2,992    | -0,352     |
| SULFRED-O       | sulfite reductase (ferredoxin) (Chloroplastides)                                                  | 8 h[h] + 6 redfer1[h] + so3[h] <=> 3 h2o[h] + 6 oxfer[h] + h2s[h]                                                                                                                                                                                                                                                                                                                                                                                     | 2,998     | 0,352      |



|                   |                                                                            |                                                                                                                                              |         |         |
|-------------------|----------------------------------------------------------------------------|----------------------------------------------------------------------------------------------------------------------------------------------|---------|---------|
| TALA              | transaldolase                                                              | $g3p[c] + s7p[c] \rightleftharpoons e4p[c] + f6p[c]$                                                                                         | -0,328  | 0,000   |
| TALA-H            | transaldolase (Chloroplast)                                                | $g3p[h] + s7p[h] \rightleftharpoons e4p[h] + f6p[h]$                                                                                         | 13,701  | 0,000   |
| THRD              | L-threonine dehydrogenase                                                  | $nad[c] + thr-L[c] \rightarrow h[c] + nadh[c] + 2aobut[c]$                                                                                   | 0,102   | 0,000   |
| THREODEAM         | L-threonine deaminase                                                      | $thr-L[c] \rightleftharpoons 2obut[c] + nh4[c]$                                                                                              | 0,043   | 0,000   |
| THRS              | threonine synthase                                                         | $h2o[c] + phom[c] \rightarrow pi[c] + thr-L[c]$                                                                                              | 0,247   | 0,000   |
| TKT1              | transketolase                                                              | $r5p[c] + xu5p-D[c] \rightleftharpoons g3p[c] + s7p[c]$                                                                                      | -0,328  | 0,000   |
| TKT1-H            | transketolase (Chloroplast)                                                | $xu5p-D[h] + r5p[h] \rightleftharpoons g3p[h] + s7p[h]$                                                                                      | -13,701 | 0,000   |
| TKT2              | transketolase                                                              | $e4p[c] + xu5p-D[c] \rightleftharpoons f6p[c] + g3p[c]$                                                                                      | -0,375  | 0,000   |
| TKT2-H            | transketolase (Chloroplast)                                                | $e4p[h] + xu5p-D[h] \rightleftharpoons g3p[h] + f6p[h]$                                                                                      | -13,701 | 0,000   |
| TMD.SYNT          | thymidylate synthase                                                       | $dump[c] + mlthf[c] \rightleftharpoons dhf[c] + dtmp[c]$                                                                                     | 0,001   | 0,000   |
| TPI               | triose-phosphate isomerase                                                 | $dhap[c] \rightleftharpoons g3p[c]$                                                                                                          | -3,320  | 0,352   |
| TPI-H             | triose-phosphate isomerase (Chloroplast)                                   | $dhap[h] \rightleftharpoons g3p[h]$                                                                                                          | -27,402 | 0,000   |
| TRDR              | thioredoxin reductase (NADPH)                                              | $nadph[c] + h[c] + trdox[c] \rightarrow nadp[c] + trdrd[c]$                                                                                  | 0,004   | 0,000   |
| TRPSYNT           | Tryptophane synthesis                                                      | $chor[c] + gln-L[c] + ser-L[c] + prpp[c] \rightleftharpoons h2o[c] + ppi[c] + h[c] + glu-L[c] + pyr[c] + co2[c] + g3p[c] + oh[c] + trp-L[c]$ | 0,001   | 0,000   |
| TYRTA             | tyrosine transaminase                                                      | $akg[c] + tyr-L[c] \rightleftharpoons glu-L[c] + 34hpp[c]$                                                                                   | -0,001  | 0,000   |
| T_AC_c_h          | Acetate transport (cytoplasm to chloroplastides)                           | $ac[c] \rightleftharpoons ac[h]$                                                                                                             | 3,891   | 0,000   |
| T_AC_c_m          | Acetate transport (cytoplasm to mitochondrium)                             | $ac[c] \rightleftharpoons ac[m]$                                                                                                             | -3,891  | 0,000   |
| T_ADP_c_h         | adp transport (cytoplasm to chloroplast)                                   | $adp[c] \rightleftharpoons adp[h]$                                                                                                           | 21,047  | 1,760   |
| T_ADP_c_m         | adp transport (cytoplasm to mitochondrium)                                 | $adp[c] \rightleftharpoons adp[m]$                                                                                                           | 34,021  | 10,352  |
| T_AKG2_c_m        | alpha-ketoglutarate (oxo-glutarate) transport (cytoplasm to mitochondrium) | $akg[c] \rightleftharpoons akg[m]$                                                                                                           | -0,446  | 0,000   |
| T_AMET_c_er       | S-Adenosyl-L-methionin Transport (cytoplasm to ER)                         | $amet[c] \rightleftharpoons amet[r]$                                                                                                         | 0,166   | 0,000   |
| T_AMP_c_h         | amp transport (cytoplasm to chloroplast)                                   | $amp[c] \rightleftharpoons amp[h]$                                                                                                           | -4,315  | 0,000   |
| T_AMP_c_m         | amp transport (cytoplasm to mitochondrium)                                 | $amp[c] \rightleftharpoons amp[m]$                                                                                                           | 3,885   | 0,000   |
| T_ANT_CA2-H_c_r   | Calcium   Proton Antiporter (extracellular to cytoplasm)                   | $ca2[c] + h[r] \rightleftharpoons h[c] + ca2[r]$                                                                                             | 23,520  | 11,760  |
| T_ANT_HCO3-Cl_e_c | Bicarbonate   Chloride antiporter (HCO3 from extracellular to cytoplasm)   | $hco3[e] + cl[c] \rightleftharpoons hco3[c] + cl[e]$                                                                                         | 0,000   | 0,000   |
| T_ATP_c_h         | atp transport (cytoplasm to chloroplast)                                   | $atp[c] \rightleftharpoons atp[h]$                                                                                                           | -16,732 | -1,760  |
| T_ATP_c_m         | atp transport (cytoplasm to mitochondrium)                                 | $atp[c] \rightleftharpoons atp[m]$                                                                                                           | -37,906 | -10,352 |
| T_CA2_e_c         | Calcium transport (extracellular to cytoplasm)                             | $ca2[e] \rightleftharpoons ca2[c]$                                                                                                           | 23,520  | 11,760  |
| T_CA2_r_o         | Calcium transport via vesicle fusion (ER to Coccolith Vesicles)            | $ca2[r] \rightleftharpoons ca2[o]$                                                                                                           | 23,520  | 11,760  |
| T_CMP_c_er        | CMP Transport (cytoplasm to ER)                                            | $cmp[c] \rightleftharpoons cmp[r]$                                                                                                           | -0,079  | 0,000   |
| T_CMP_c_h         | CMP transport (cytoplasm to Chloroplastid)                                 | $cmp[c] \rightleftharpoons cmp[h]$                                                                                                           | -0,006  | 0,000   |
| T_CO2_c_er        | CO2 Transport (cytoplasm to ER)                                            | $co2[c] \rightleftharpoons co2[r]$                                                                                                           | -0,070  | 0,000   |
| T_COA_c_er        | COA Transport (cytoplasm to ER)                                            | $coa[c] \rightleftharpoons coa[r]$                                                                                                           | -0,158  | 0,000   |
| T_COA_c_h         | Coenzyme A transport (cytoplasm to chloroplastides)                        | $coa[c] \rightleftharpoons coa[h]$                                                                                                           | 0,158   | 0,000   |
| T_COA_c_m         | Coenzym A transport (cytoplasm to mitochondrium)                           | $coa[c] \rightleftharpoons coa[m]$                                                                                                           | 0,000   | 0,000   |
| T_CTP_c_er        | CTP transport (cytoplasm to ER)                                            | $ctp[c] \rightleftharpoons ctp[r]$                                                                                                           | 0,079   | 0,000   |
| T_CTP_c_h         | CTP transport (cytoplasm to Chloroplastid)                                 | $ctp[c] \rightleftharpoons ctp[h]$                                                                                                           | 0,006   | 0,000   |
| T_CYS_c_m         | Cysteintransport (extracellular to mitochondria)                           | $cys-L[c] \rightleftharpoons cys-L[m]$                                                                                                       | -0,006  | 0,000   |

|                    |                                                                                   |                                                 |         |         |
|--------------------|-----------------------------------------------------------------------------------|-------------------------------------------------|---------|---------|
| T_FA-COA.REPL2_c_m | coa-fatty acid replacement transport (cytoplasm to mitochondrium)                 | fa-coa.replace_i[c] <=> fa-coa.replace_i[m]     | 0,000   | 0,000   |
| T_FA-COA.REPL4_h_c | Transport for fatty acid-coa replacement metabolite (chloroplastide to cytoplasm) | fa-coa.replace_i[h] <=> fa-coa.replace_i[c]     | 0,158   | 0,000   |
| T_FA-COA_c_er      | fatty acid Coa Transport (cytoplasm to ER)                                        | fa-coa.replace_i[c] <=> fa-coa.replace_i[r]     | 0,158   | 0,000   |
| T_FA.REPL4_h_c     | Transport for fatty acid replacement metabolite (chloroplastide to cytoplasm)     | fa.replace_d[h] <=> fa.replace_d[c]             | 0,000   | 0,000   |
| T_FUM_c_m          | Fumarate transport (cytoplasm to mitochondrium)                                   | fum[c] <=> fum[m]                               | 0,411   | 0,000   |
| T_G3P_c_er         | Glyceraldehyd 3 Phosphat (cytoplasm to ER)                                        | g3p[c] <=> g3p[r]                               | 0,079   | 0,000   |
| T_G3P_c_h          | Glyceraldehyd 3 Phosphat (cytoplasm to chloroplastide)                            | g3p[c] <=> g3p[h]                               | -11,190 | 1,056   |
| T_GDP_c_m          | gdp transport (cytoplasm to mitochondrium)                                        | gdp[c] <=> gdp[m]                               | 0,000   | 0,704   |
| T_GLN_c_h          | Glutamine transport (cytoplasm to chloroplast)                                    | gln-L[c] <=> gln-L[h]                           | 0,000   | 0,000   |
| T_GLN_c_m          | Glutamine transport (cytoplasm to mitochondrium)                                  | gln-L[c] <=> gln-L[m]                           | 0,000   | 0,000   |
| T_GLU_c_h          | Glutamate transport (cytoplasm to chloroplast)                                    | glu-L[c] <=> glu-L[h]                           | 0,000   | 0,000   |
| T_GLU_c_m          | Glutamate transport (cytoplasm to mitochondrium)                                  | glu-L[c] <=> glu-L[m]                           | 0,000   | 0,000   |
| T_GLYCLT_h_c       | Glycolate Transport (Chloroplast to Cytoplasm)                                    | glyclt[h] <=> glyclt[c]                         | 0,091   | 0,000   |
| T_GLY_c_m          | Glycine transport (cytoplasm to mitochondrium)                                    | gly[c] <=> gly[m]                               | 0,012   | 0,000   |
| T_GTP_c_m          | gtp transport (cytoplasm to mitochondrium)                                        | gtp[c] <=> gtp[m]                               | 0,000   | -0,704  |
| T_H2O_ch           | H2O transport (cytoplasm to Chloroplast)                                          | h2o[c] <=> h2o[h]                               | 55,354  | -2,113  |
| T_H2O_cm           | H2O transport (cytoplasm to Mitochondrium)                                        | h2o[c] <=> h2o[m]                               | -38,358 | -12,464 |
| T_H2O_e_c          | H2O transport (extracellular to cytoplasm)                                        | h2o[e] <=> h2o[c]                               | 50,695  | 9,295   |
| T_H2S_c_h          | Hydrogen sulfide transport (cytoplasm to chloroplast)                             | h2s[c] <=> h2s[h]                               | -2,998  | -0,352  |
| T_H2S_c_m          | Hydrogen sulfide transport (cytoplasm to mitochondrium)                           | h2s[c] <=> h2s[m]                               | 2,998   | 0,352   |
| T_HCO3_c_o         | Bicarbonate transport (cytoplasm to coccolith vesicle)                            | hco3[c] <=> hco3[o]                             | 23,520  | 11,760  |
| T_HCYS_c_er        | Homocystein Transport (cytoplasm to ER)                                           | hcys-L[c] <=> hcys-L[r]                         | -0,166  | 0,000   |
| T_H_c_h            | Proton transport (cytoplasm to chloroplastide)                                    | h[c] <=> h[h]                                   | -24,243 | 1,408   |
| T_H_c_m            | Proton transport (cytoplasm to mitochondrium)                                     | h[c] <=> h[m]                                   | 32,375  | 11,056  |
| T_H_c_o            | Proton transport (cytoplasm to coccolith vesicle)                                 | h[o] <=> h[c]                                   | 23,520  | 11,760  |
| T_H_c_r 2          | ATPvc/c <sup>+</sup> builds up protongradient in ER (H from cytoplasm to ER)      | h2o[c] + atp[c] <=> pi[c] + adp[c] + h[r]       | 23,520  | 11,760  |
| T_H_e_c            | Proton transport (extracellular to cytoplasm)                                     | h[e] <=> h[c]                                   | -49,160 | -23,520 |
| T_INOST_c_er       | myo-Inositol Transport (cytoplasm to ER)                                          | inost[c] <=> inost[r]                           | 0,003   | 0,000   |
| T_LIPID-CHLORO_c_h | Chloroplast Lipid transport (cytoplasm to Chloroplastid)                          | lipid.chloroplast2[c] <=> lipid.chloroplast2[h] | -0,510  | 0,000   |
| T_LIPID.ER2_c_er   | LIPID Transport (cytoplasm to ER)                                                 | lipid.er4[r] <=>                                | 0,510   | 0,000   |
| T_NH4_c_h          | Ammonium Transporter (cytoplasm to chloroplastide)                                | nh4[c] <=> nh4[h]                               | 0,000   | 0,000   |

|                   |                                                                       |                                                 |         |        |
|-------------------|-----------------------------------------------------------------------|-------------------------------------------------|---------|--------|
| T_NH4_c_m         | Ammonium Transporter (cytoplasm to mitochondrion)                     | nh4[c] <=> nh4[m]                               | -0,006  | 0,000  |
| T_NH4_e_c         | Ammonium Transporter (extracellular to cytoplasm)                     | nh4[e] <=> nh4[c]                               | 3,615   | 0,000  |
| T_O2_c_h          | O2 transport (cytoplasm to chloroplasts)                              | o2[c] <=> o2[h]                                 | -47,176 | 0,000  |
| T_O2_c_m          | O2 transport via diffusion (cytoplasm to mitochondrion)               | o2[c] <=> o2[m]                                 | 7,088   | 2,289  |
| T_O2_e_c          | O2 transport via diffusion (extracellular to cytoplasm)               | o2[e] <=> o2[c]                                 | -40,019 | 2,289  |
| T_OAA_c_m         | Oxalacetate transport (cytoplasm to mitochondrion)                    | oaa[c] <=> oaa[m]                               | 0,035   | 0,000  |
| T_PEP_c_h         | Phosphoenolpyruvate transport (cytoplasm to chloroplast)              | pep[c] <=> pep[h]                               | -2,288  | -0,352 |
| T_PI_c_er         | Phosphate Transport (cytoplasm to ER)                                 | pi[c] <=> pi[r]                                 | -0,012  | 0,000  |
| T_PPI_c_er        | Pyrophosphate Transport (cytoplasm to ER)                             | ppi[c] <=> ppi[r]                               | -0,073  | 0,000  |
| T_PPI_c_h         | Pyrophosphate transport (cytoplasm to chloroplast)                    | ppi[c] <=> ppi[h]                               | -4,315  | 0,000  |
| T_PPI_c_m         | Pyrophosphate transport (cytoplasm to mitochondrion)                  | ppi[c] <=> ppi[m]                               | 3,885   | 0,000  |
| T_PYR_c_h         | pyruvate transport (cytoplasm to chloroplast)                         | pyr[c] <=> pyr[h]                               | 0,000   | -0,704 |
| T_PYR_c_m         | pyruvate transport (cytoplasm to mitochondrion)                       | pyr[c] <=> pyr[m]                               | 4,337   | 0,704  |
| T_Pi_c_h          | Orthophosphate transport (cytoplasm to chloroplast)                   | pi[c] <=> pi[h]                                 | 34,521  | 1,056  |
| T_Pi_c_m          | Orthophosphate transport (cytoplasm to mitochondrion)                 | pi[c] <=> pi[m]                                 | 34,021  | 11,056 |
| T_Pi_e_c          | Orthophosphate transport (extracellular to cytoplasm)                 | pi[e] <=> pi[c]                                 | 0,669   | 0,000  |
| T_SER_c_er        | Serine Transport (cytoplasm to ER)                                    | ser-L[c] <=> ser-L[r]                           | 0,070   | 0,000  |
| T_SUCC_c_m        | Succinate transport (cytoplasm to mitochondrion)                      | succ[c] <=> succ[m]                             | 0,000   | 0,000  |
| T_SYM_HCO3+Na_e_c | Bicarbonate   Sodium Symporter (HCO3 from extracellular to cytoplasm) | na1[e] + hco3[e] <=> hco3[c] + na1[c]           | 0,000   | 0,000  |
| T_So3_c_h         | Sulfite transport (cytoplasm to chloroplast)                          | so3[c] <=> so3[h]                               | 2,998   | 0,352  |
| T_So3_c_m         | Sulfite transport (cytoplasm to mitochondrion)                        | so3[c] <=> so3[m]                               | -2,992  | -0,352 |
| T_So4_e_c         | Sulfate transport (extracellular to cytoplasm)                        | so4[e] <=> so4[c]                               | 0,023   | 0,000  |
| T_UDP-GAL_c_h     | UDP Galactose transport (cytoplasm to Chloroplast)                    | udpgal[c] <=> udpgal[h]                         | 0,136   | 0,000  |
| T_UDP-SQV_c_h     | UDP Sulfoquinovose transport (cytoplasm to Chloroplast)               | udp-sqv[c] <=> udp-sqv[h]                       | 0,017   | 0,000  |
| T_UDP_c_h         | UDP transport (cytoplasm to Chloroplast)                              | udp[c] <=> udp[h]                               | -0,153  | 0,000  |
| T_hn_e_h          | Photon transport (extracellular to chloroplast)                       | hn[e] -> hn[h]                                  | 387,840 | 0,000  |
| T_no2_c_h         | Nitrite transport (cytoplasm to chloroplast)                          | no2[c] <=> no2[h]                               | 0,000   | 0,000  |
| T_no3_e_c         | Nitrate transporter (extracellular to cytoplasm)                      | no3[e] <=> no3[c]                               | 0,000   | 0,000  |
| UDP-SQV.SYNT      | UDP-sulfoquinovose synthesis                                          | h[c] + udpg[c] + so3[c] <=> h2o[c] + udp-sqv[c] | 0,017   | 0,000  |
| UDPG4E            | UDPGlucose 4-epimerase                                                | udpg[c] <=> udpgal[c]                           | 1,127   | 0,000  |

|                                                      |                                                                                             |                                                               |        |       |
|------------------------------------------------------|---------------------------------------------------------------------------------------------|---------------------------------------------------------------|--------|-------|
| UDPGALACTAN.SYNT(300)                                | UDP-Galactan synthesis. UDP-alpha-D-galactose:<br>galactan beta-1.4-D-galactosyltransferase | 300 udpgal[c] -> 299 h[c] + udp.galactan(300)[c] + 299 udp[c] | 0,000  | 0,000 |
| UMPK                                                 | UMP kinase                                                                                  | atp[c] + ump[c] <=> adp[c] + udp[c]                           | 0,057  | 0,000 |
| URASE                                                | urease                                                                                      | h2o[c] + urea[c] -> 2 nh3_[c] + co2[c]                        | 0,000  | 0,000 |
| URIDK2r                                              | uridylate kinase (dUMP)                                                                     | atp[c] + dump[c] <=> adp[c] + dudp[c]                         | -0,002 | 0,000 |
| VALSYNT                                              | Valine Synthetase ( branched-chain-amino-acid<br>transaminase)                              | glu-L[c] + 3mob[c] <=> akg[c] + val-L[c]                      | 0,073  | 0,000 |
| dTDP.DEPHOS                                          | dTDP nucleotidohydrolase                                                                    | h2o[c] + dtdp[c] -> pi[c] + h[c] + dtmp[c]                    | 0,000  | 0,000 |
| dTTP.DEPHOS                                          | dTTP nucleotidohydrolase                                                                    | h2o[c] + dttp[c] -> pi[c] + h[c] + dtdp[c]                    | 0,000  | 0,000 |
| t2_mnl[c]_transfer                                   |                                                                                             |                                                               | 0,352  | 0,000 |
| t2_lipid.biomass5.[c]_transfer                       |                                                                                             |                                                               | 0,000  | 0,000 |
| t2_protein.biomass1.6[c]_transfer                    |                                                                                             |                                                               | 0,000  | 0,000 |
| t2_lipid.chloroplast2[c]_transfer                    |                                                                                             |                                                               | 0,000  | 0,000 |
| t2_biomass_log_200_24h_neutrcharge_final[c]_transfer |                                                                                             |                                                               | 0,924  | 0,924 |

---
